# Supplementary material for: 5'-oxospiro3 (fluorene-9,4'-imidazolidine)-2'-thione
Source: Preprints.org preprint supplement (doi:10.20944/preprints202407.2597.v1), 2024-08-01
Supplement: Supplementary file 1 [file supplementary]

## Supplementary file

**Dimitar Stoitsov<sup>1</sup>, Marin Marinov<sup>2</sup>, Plamen Penchev<sup>1</sup>, Petya Marinova<sup>3\*</sup>, Neyko Stoyanov<sup>4</sup>**

<sup>1</sup> Department of Analytical Chemistry and Computer Chemistry, Faculty of Chemistry, University of Plovdiv, "Tzar Asen" str., 24 Plovdiv 4000, Bulgaria, E-mail: stoitsov@uni-plovdiv.bg (D.S.); plamennpenchev@gmail.com (P.P.)

<sup>2</sup> Department of Chemistry and Phytopharmacy, Faculty of Plant protection and Agroecology, Agricultural University – Plovdiv; m\_n\_marinov@abv.bg (M.M)

<sup>3</sup> Department of General and Inorganic Chemistry with Methodology of Chemistry Education, Faculty of Chemistry, "Tzar Assen" str. 24, Plovdiv 4000, Bulgaria, E-mail: marinova@uni-plovdiv.bg (P.M.)

<sup>4</sup> Department of Chemical, Food and Biotechnologies, "Angel Kanchev" University of Ruse, Razgrad Branch, Email: nstoianov@uni-ruse.bg (N.S)

\* Correspondence: marinova@uni-plovdiv.bg

## **Contents**

|                                                                                                            |       |
|------------------------------------------------------------------------------------------------------------|-------|
| 1. The <sup>1</sup> H NMR spectrum of 5'-oxospiro-(fluorene-9,4'-imidazolidine)-2'-thione                  | pg.3  |
| 2. The <sup>13</sup> C NMR spectrum of 5'-oxospiro-(fluorene-9,4'-imidazolidine)-2'-thione                 | pg. 3 |
| 3. The DEPT 135 spectrum of 5'-oxospiro-(fluorene-9,4'-imidazolidine)-2'-thione                            | pg.4  |
| 4. The HMQC spectrum of 5'-oxospiro-(fluorene-9,4'-imidazolidine)-2'-thione                                | pg. 4 |
| 5. The <sup>1</sup> H- <sup>1</sup> H COSY spectrum of 5'-oxospiro-(fluorene-9,4'-imidazolidine)-2'-thione | pg. 5 |
| 6. The HMBC spectrum of 5'-oxospiro-(fluorene-9,4'-imidazolidine)-2'-thione                                | pg. 5 |
| 7. The ATR spectrum of 5'-oxospiro-(fluorene-9,4'-imidazolidine)-2'-thione                                 | pg. 6 |
| 8. The Raman spectrum of 5'-oxospiro-(fluorene-9,4'-imidazolidine)-2'-thione                               | pg. 6 |

## 1. 1D NMR spectra of 5'-oxospiro-(fluorene-9,4'-imidazolidine)-2'-thione

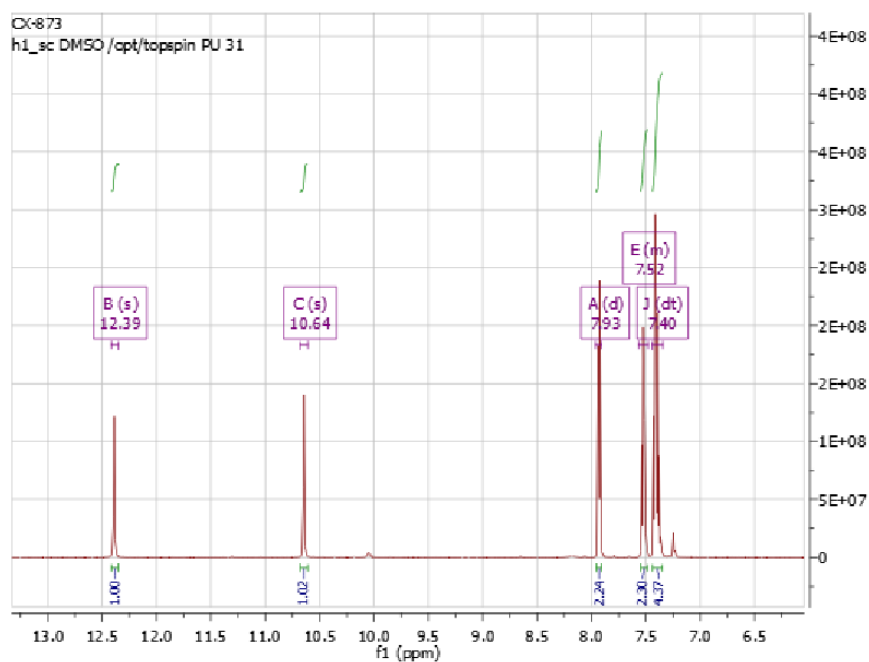

Figure S1: <sup>1</sup>H NMR spectrum of 5'-oxospiro-(fluorene-9,4'-imidazolidine)-2'-thione

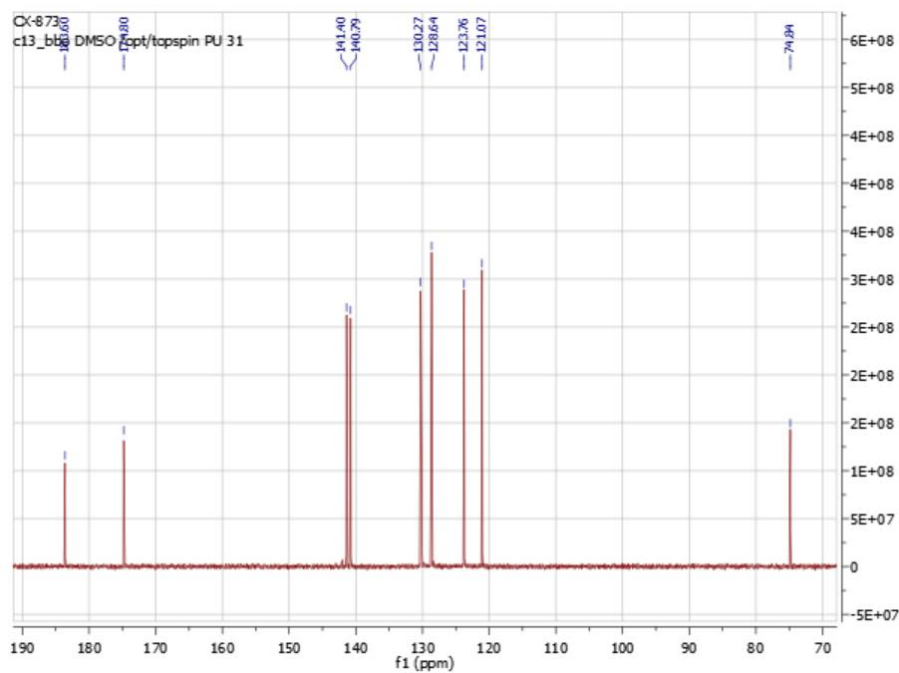

Figure S2: <sup>13</sup>C NMR spectrum of 5'-oxospiro-(fluorene-9,4'-imidazolidine)-2'-thione

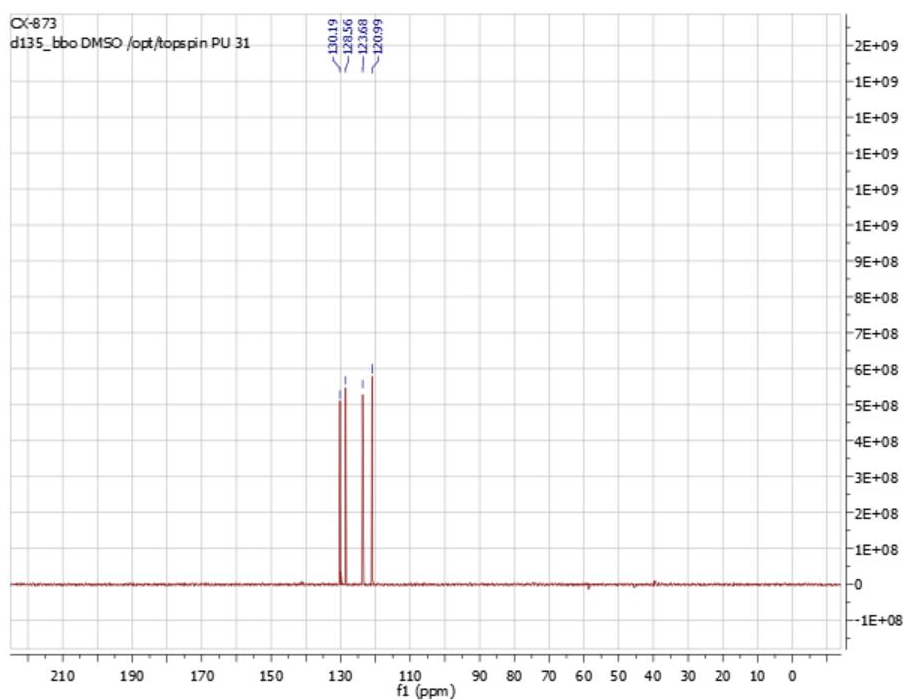

Figure S3: DEPT 135 spectrum of 5'-oxospiro-(fluorene-9,4'-imidazolidine)-2'-thione

## 2. 2D NMR spectra of 5'-oxospiro-(fluorene-9,4'-imidazolidine)-2'-thione

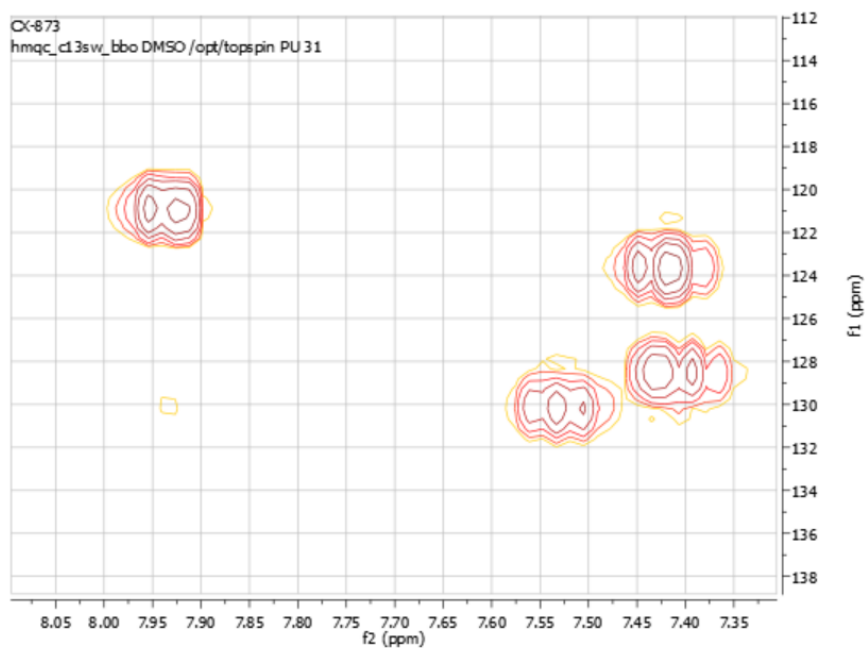

Figure S4: HMQC spectrum of 5'-oxospiro-(fluorene-9,4'-imidazolidine)-2'-thione

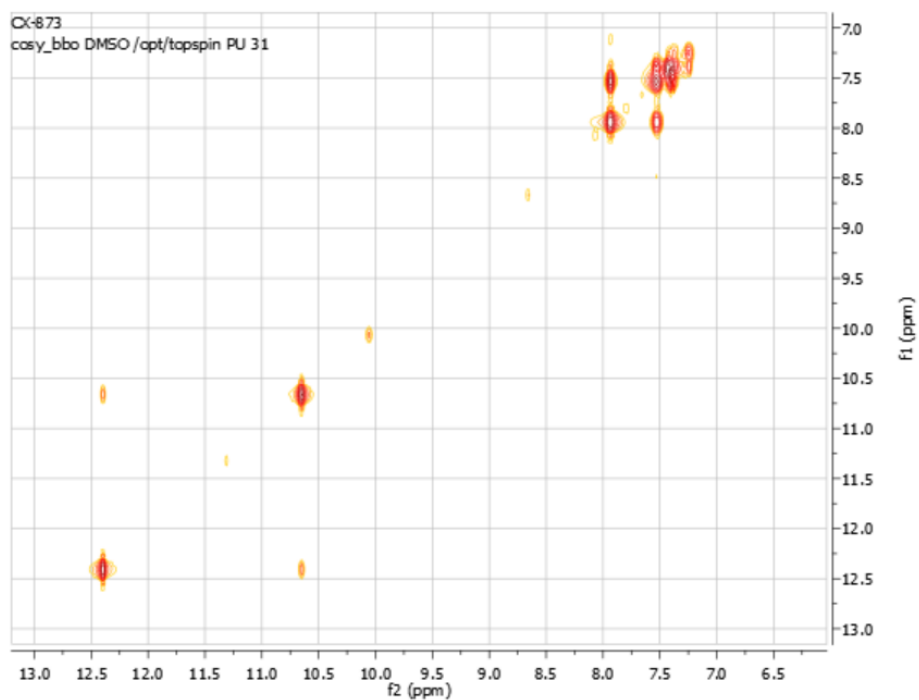

Figure S5:  $^1\text{H}$ - $^1\text{H}$  COSY spectrum of 5'-oxospiro-(fluorene-9,4'-imidazolidine)-2'-thione

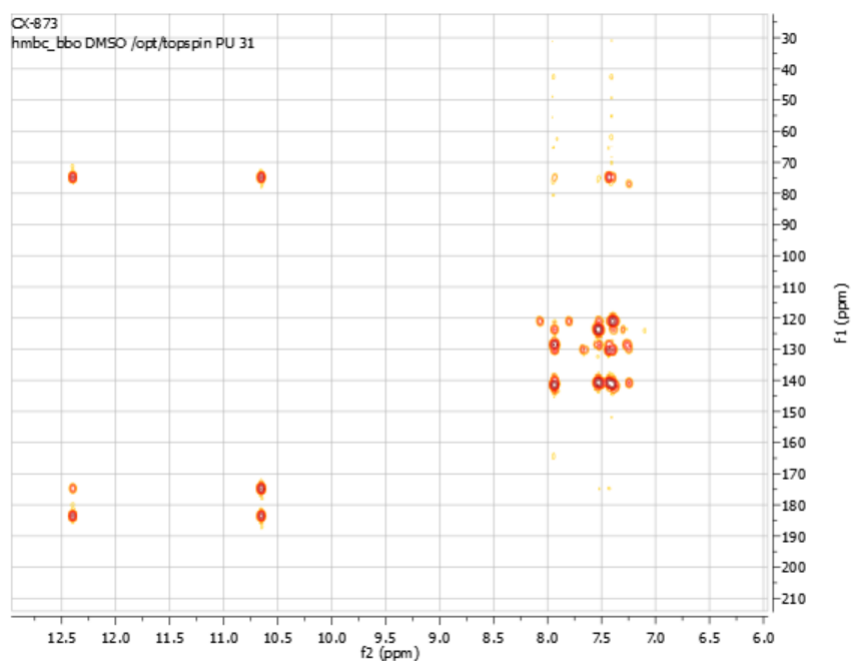

Figure S6: HMBC spectrum of 5'-oxospiro-(fluorene-9,4'-imidazolidine)-2'-thione

### 3. Vibrational spectra of 5'-oxospiro-(fluorene-9,4'-imidazolidine)-2'-thione

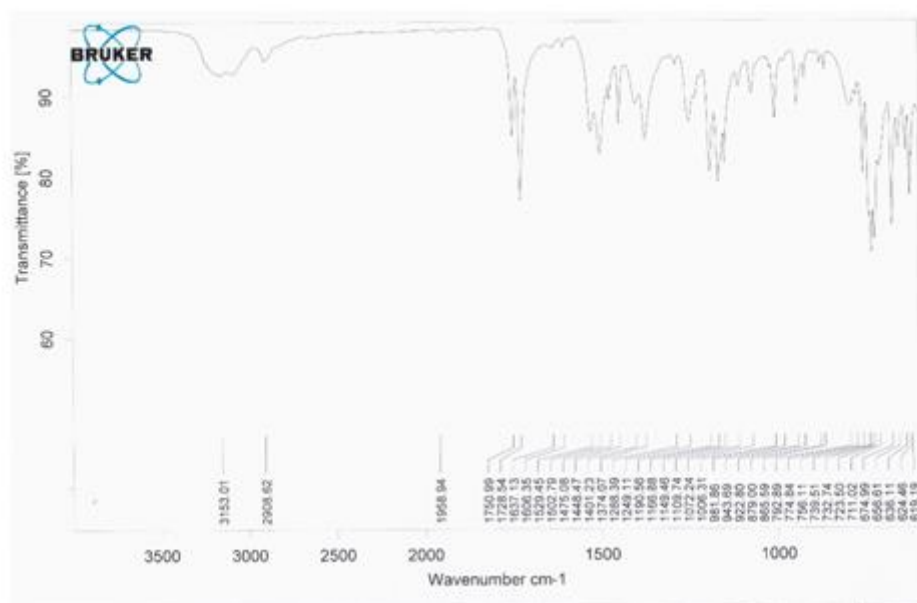

Figure S7: ATR spectrum of 5'-oxospiro-(fluorene-9,4'-imidazolidine)-2'-thione

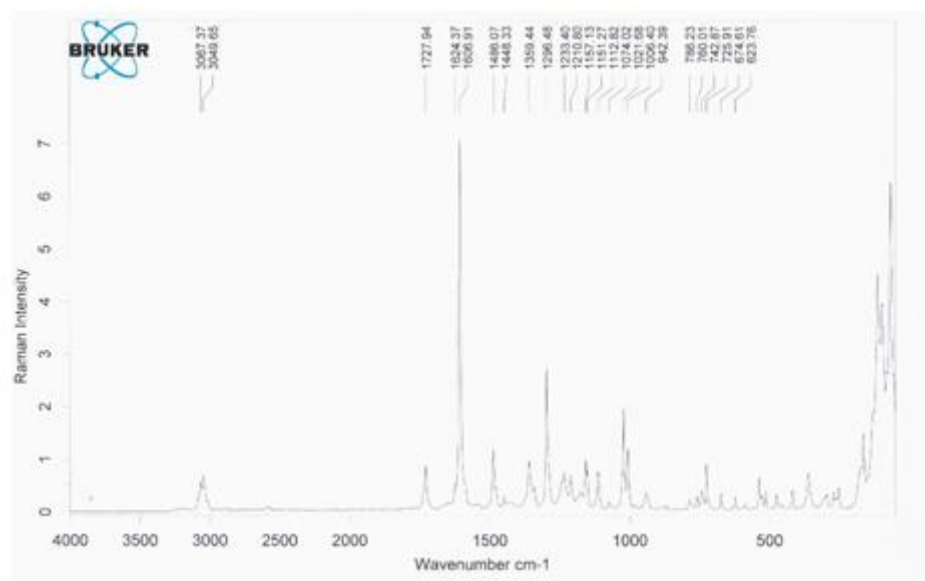

Figure S8: Raman spectrum of 5'-oxospiro-(fluorene-9,4'-imidazolidine)-2'-thione
